# Supplementary material for: Anatomical and physiological responses of Aechmea blanchetiana (Bromeliaceae) induced by silicon and sodium chloride stress during in vitro culture
Source: PeerJ. 2023 Jan 11;11:e14624. doi: 10.7717/peerj.14624 (PMC9840392; doi:10.7717/peerj.14624)
Supplement: Supplemental Information 1 [file peerj-11-14624-s001.xlsx]

## Sheet: Anatomy
Si (µM)	Treatment (NaCl)				Si (µM)	Treatment (NaCl) (µM)	Number metaxylem vessels	sclerenchyma	phloem	diameterxylemvessels
14 µM	0				14 µM	0	4	1075.44	614.48	10.36
14 µM	0				14 µM	0	9	1051.9	387	10.04
14 µM	0				14 µM	0	5	726.352	582.21	10.3
14 µM	0				14 µM	0	5	864.518	596.92	9.68
14 µM	0				14 µM	0	4.5	729.285	605.59	9.31
14 µM	0				14 µM	0	8	828.502	573.72	9.66
14 µM	100				14 µM	100	5	673.73	579.13	9.63
14 µM	100				14 µM	100	4	920.49	567.58	10.06
14 µM	100				14 µM	100	5.5	1133.17	366.69	10.05
14 µM	100				14 µM	100	6	849.22	381.19	9.76
14 µM	100				14 µM	100	9.5	1141.03	594.84	11.76
14 µM	100				14 µM	100	7	850.08	555.12	10.41
14 µM	200				14 µM	200	5	1038.07	589.89	10.9
14 µM	200				14 µM	200	5.5	993.93	414.49	9.09
14 µM	200				14 µM	200	5.5	1178.41	537.52	8.05
14 µM	200				14 µM	200	5.5	1360.08	785	9.78
14 µM	200				14 µM	200	7	1096.77	352.77	9.54
14 µM	200				14 µM	200	4.5	948.51	504.38	10.55
14 µM	300				14 µM	300	6	893.15	669.14	9.95
14 µM	300				14 µM	300	6	797.14	399.28	7.76
14 µM	300				14 µM	300	4.5	1486.18	908.94	10.89
14 µM	300				14 µM	300	6	1367.49	689.07	9.96
14 µM	300				14 µM	300	4.5	752.68	828.49	8.68
14 µM	300				14 µM	300	7	1111.32	696.27	9.79
0 µM	0				0 µM	0	7	987.08	466.51	9.71
0 µM	0				0 µM	0	6.5	1014.35	440.91	9.05
0 µM	0				0 µM	0	6.5	965.04	483.12	9.34
0 µM	0				0 µM	0	5.5	680.75	589.64	10.7
0 µM	0				0 µM	0	6.5	888.48	671.49	10.08
0 µM	0				0 µM	0	5	893.96	687.36	9.96
0 µM	100				0 µM	100	6	1043.13	588.52	9.88
0 µM	100				0 µM	100	4.5	1112.9	781.85	12.09
0 µM	100				0 µM	100	6	1571.23	614.54	9.44
0 µM	100				0 µM	100	6	1024.38	542.45	10.69
0 µM	100				0 µM	100	7.5	984.2	702.11	10.53
0 µM	100				0 µM	100	5	1137.59	788.79	10.24
0 µM	200				0 µM	200	3	1281.41	592.6	10.45
0 µM	200				0 µM	200	6.5	705.71	376.23	8.49
0 µM	200				0 µM	200	6.5	1201.75	601.98	10.06
0 µM	200				0 µM	200	7	1323.13	744.6	11.23
0 µM	200				0 µM	200	7.5	814.55	396.05	9.67
0 µM	200				0 µM	200	7	1244.77	590.86	10.26
0 µM	300				0 µM	300	5	846.27	459.33	10.47
0 µM	300				0 µM	300	5	1256.29	738.89	10.36
0 µM	300				0 µM	300	6	1002.11	687.57	9.2
0 µM	300				0 µM	300	7	834.92	529.36	8.19
0 µM	300				0 µM	300	6.5	671.95	548.19	8.5
0 µM	300				0 µM	300	7	1006.64	777.27	10.93

## Sheet: Figure 1
Si (µM)	Treatment (NaCl) (µM)	Root transverse diameter (µm)	Cell wall thickness of root exodermis (µm)
14 µM	0	338.23	2.12
14 µM	0	387.23	2.02
14 µM	0	313.68	1.85
14 µM	0	351.05	2.1
14 µM	0	332.38	1.59
14 µM	0	456.23	1.97
14 µM	100	417.69	1.76
14 µM	100	433.77	1.95
14 µM	100	401.33	2
14 µM	100	401.38	1.94
14 µM	100	443.6	2.27
14 µM	100	461.62	1.82
14 µM	200	367.67	2.17
14 µM	200	354.87	2.54
14 µM	200	421.05	2.1
14 µM	200	456.44	2.61
14 µM	200	415.14	1.76
14 µM	200	374.43	2.7
14 µM	300	369.16	2.02
14 µM	300	373.9	2.32
14 µM	300	378.95	1.33
14 µM	300	395.13	2.34
14 µM	300	408.57	2.11
14 µM	300	427.19	2.4
0 µM	0	383.32	3.89
0 µM	0	334.27	3.36
0 µM	0	386.32	3.78
0 µM	0	308.98	3.03
0 µM	0	363.16	3.72
0 µM	0	316.42	3.18
0 µM	100	506.79	3.22
0 µM	100	362.16	2.16
0 µM	100	327.82	3.35
0 µM	100	489.13	2.77
0 µM	100	436.59	1.8
0 µM	100	406.19	2.62
0 µM	200	378.75	3.59
0 µM	200	380.51	2.2
0 µM	200	393.14	2.53
0 µM	200	334.92	2.3
0 µM	200	397.01	1.96
0 µM	200	370.6	1.78
0 µM	300	374.49	1.68
0 µM	300	289.75	2.31
0 µM	300	364.2	2.24
0 µM	300	410.6	2.26
0 µM	300	406.02	3.01
0 µM	300	343.5	2.94

## Sheet: Figure 2
Si (µM)	Treatment (NaCl) (µM)	Stomatal density at the base (0.01 mm-2)	Stomatal density at the middle (0.01mm-2)	Stomatal size at the middle (μm2)
14 µM	0	1.5	3.25	571.03
14 µM	0	1.75	2.25	573.55
14 µM	0	2.5	3.75	569.22
14 µM	0	1.25	2.75	548.8
14 µM	0	1	2.5	631.4
14 µM	0	1	3.5	588.26
14 µM	100	1	3	544.23
14 µM	100	1.5	3	541.1
14 µM	100	1.5	3.25	539.4
14 µM	100	1	2.5	587.22
14 µM	100	1.25	2.75	576.08
14 µM	100	2.75	3.25	528.67
14 µM	200	1.5	4	560.88
14 µM	200	1	2	565.07
14 µM	200	1	3.5	536.24
14 µM	200	1.25	3.25	532.2
14 µM	200	1	3	549.39
14 µM	200	1	3.5	573.43
14 µM	300	1	2.75	569.04
14 µM	300	1.25	3.25	587.26
14 µM	300	1	3.5	617.46
14 µM	300	1	2.25	508.06
14 µM	300	1	3.25	546.37
14 µM	300	1	3.5	504.42
0 µM	0	1.25	3.25	579.63
0 µM	0	1.5	3.75	577.12
0 µM	0	1.5	4	521.23
0 µM	0	1	3.25	622.89
0 µM	0	1.25	2.5	630.5
0 µM	0	3	4.5	605.87
0 µM	100	1.25	3.25	589.44
0 µM	100	1.75	3.25	620.95
0 µM	100	1	4	632.14
0 µM	100	1.5	3.75	563.81
0 µM	100	1.25	3.5	570.31
0 µM	100	1	3.75	615.71
0 µM	200	1	3.5	586.11
0 µM	200	1	3.5	583.37
0 µM	200	1.25	3.5	597.74
0 µM	200	1	3.5	556.12
0 µM	200	1	3.75	573.41
0 µM	200	1	3.75	558.98
0 µM	300	1	3	551.14
0 µM	300	1	3.75	603.89
0 µM	300	1	4.5	506.36
0 µM	300	1	3.25	533.05
0 µM	300	1	3.25	564.02
0 µM	300	1	3.5	540.71

## Sheet: Figure 4
Si (µM)	Treatment (NaCl) (µM)	Adaxial epidermis (µm)	Abaxial epidermis (µm)	Chlorenchyma (µm)
14 µM	0	14.23	15.1	258.76
14 µM	0	13.89	9.535	293.015
14 µM	0	13.53	8.1	328.135
14 µM	0	14.31	13.32	276.085
14 µM	0	14.8	9.735	262.79
14 µM	0	14.54	11.58	238.88
14 µM	100	13.08	10.3	251.72
14 µM	100	13.91	9.93	298.22
14 µM	100	16.27	10.7	315.86
14 µM	100	14.25	7.9	254.09
14 µM	100	12.94	9.2	250.94
14 µM	100	14.83	12.37	296.44
14 µM	200	12.76	9.21	299.39
14 µM	200	15.94	10.3	319.61
14 µM	200	15.01	12.03	250.52
14 µM	200	17.14	11.02	284.69
14 µM	200	12.63	8.08	283.84
14 µM	200	13.67	8.69	266.52
14 µM	300	17.96	12.83	287.83
14 µM	300	16.25	10.44	295.6
14 µM	300	15.17	10.52	293.49
14 µM	300	16.94	11.79	289.85
14 µM	300	19.04	12.84	242.55
14 µM	300	19.01	12.4	268.85
0 µM	0	14.06	10.98	233.39
0 µM	0	9.39	6.91	207.76
0 µM	0	15.61	9.44	233.31
0 µM	0	14.8	9.35	260.09
0 µM	0	17.87	10.13	246.33
0 µM	0	18.02	10.61	232.07
0 µM	100	14.81	9.91	251.92
0 µM	100	14.82	8.9	298.03
0 µM	100	12.69	9.83	290.7
0 µM	100	14.18	6.59	268.01
0 µM	100	15.5	8.68	278.43
0 µM	100	16.02	10.63	235.03
0 µM	200	14.48	9.11	280.67
0 µM	200	14.28	9.29	313.02
0 µM	200	15.85	8.71	306.74
0 µM	200	15.55	10.74	259.42
0 µM	200	15.59	9.98	303.72
0 µM	200	13.84	11.25	267.91
0 µM	300	18.91	13.07	318.14
0 µM	300	19.49	11.51	259.09
0 µM	300	16.36	11.5	279.57
0 µM	300	20.13	14.38	338.04
0 µM	300	17.69	16.45	295.42
0 µM	300	18.65	11.58	230.46

## Sheet: Figure 5
Si (µM)	Treatment (NaCl) (µM)	S (g kg-1)	Mg (g kg-1)	B (mg kg-1)	Na (mg kg-1)
14 (µM)	0	0.251	0.125	24.185	0.472
14 (µM)	0	0.256	0.128	17.63	0.429
14 (µM)	0	0.238	0.111	34.87	0.354
14 (µM)	100	0.191	0.09	30.513	1.225
14 (µM)	100	0.207	0.094	25.585	1.264
14 (µM)	100	0.179	0.085	44.43	1.309
14 (µM)	200	0.176	0.069	37.835	1.98
14 (µM)	200	0.183	0.069	47.115	2.086
14 (µM)	200	0.162	0.069	46.03	2.154
14 (µM)	300	0.179	0.076	47.16	2.653
14 (µM)	300	0.183	0.082	36.605	2.806
14 (µM)	300	0.243	0.097	60.16	3.249
0 (µM)	0	0.219	0.105	34.445	0.182
0 (µM)	0	0.204	0.098	36.335	0.149
0 (µM)	0	0.216	0.095	39.585	0.179
0 (µM)	100	0.175	0.067	28.49	1.094
0 (µM)	100	0.174	0.073	18.91	1.146
0 (µM)	100	0.181	0.075	28.595	1.162
0 (µM)	200	0.228	0.075	31.585	2.354
0 (µM)	200	0.18	0.067	23.905	2.07
0 (µM)	200	0.182	0.07	47.155	2.117
0 (µM)	300	0.149	0.064	25.72	2.212
0 (µM)	300	0.165	0.062	32.465	2.168
0 (µM)	300	0.151	0.064	20.2	2.283

## Sheet: Figure 6
Si (µM)	Treatment (NaCl) (µM)	Fe (mg kg-1)	Zn (mg kg-1)	Mn (mg kg-1)	N (g kg-1)	K (g kg-1)	Ca (g kg-1)
14 (µM)	0	223.985	58.9	114.615	1.52	2.083	0.21
14 (µM)	0	233.74	60.74	100.98	2.156	2.824	0.207
14 (µM)	0	200.405	53.795	93.05	1.956	1.962	0.189
14 (µM)	100	131.934	44.625	78.27	1.98	2.38	0.179
14 (µM)	100	122.87	51.22	82.155	2.019	2.612	0.172
14 (µM)	100	175.36	47.645	77.155	1.956	2.213	0.143
14 (µM)	200	182.8	43.35	72.225	1.707	1.855	0.14
14 (µM)	200	175.31	44.625	74.42	1.62	1.942	0.139
14 (µM)	200	132.075	35.575	59.12	1.645	1.717	0.124
14 (µM)	300	139.12	43.105	72.51	1.844	2.043	0.147
14 (µM)	300	175.485	48.3	83.21	2.143	2.01	0.17
14 (µM)	300	258.445	60.515	105.77	1.719	1.867	0.201
0 (µM)	0	218.06	56.295	83.615	1.707	2.113	0.176
0 (µM)	0	210.9	48.775	82.73	1.819	1.593	0.171
0 (µM)	0	235.3	50.365	86.525	1.794	1.617	0.17
0 (µM)	100	197.405	43.415	68.08	1.757	1.775	0.138
0 (µM)	100	182.09	43.67	71.725	1.819	2.179	0.143
0 (µM)	100	205.18	48.465	77.735	1.52	2.076	0.149
0 (µM)	200	208.78	51.63	83.95	1.707	1.876	0.153
0 (µM)	200	138.375	38.42	63.965	1.57	2.017	0.119
0 (µM)	200	151.2	38.85	61	1.657	2.286	0.126
0 (µM)	300	135.645	39.015	64.88	1.52	1.971	0.131
0 (µM)	300	132.04	37.105	66.85	1.832	1.792	0.117
0 (µM)	300	152.845	37.79	69.77	1.458	1.854	0.13

## Sheet: Figure 7
Si (µM)	Treatment (NaCl) (µM)	SOD (U min-1 mg-1 prtn) leaves	CAT (µmol min-1 mg-1 prtn) leaves	APX (nmol min-1 mg-1 prtn) leaves	SOD (U min-1 mg-1 prtn) root	CAT (µmol min-1 mg-1 prtn) root	APX (nmol min-1 mg-1 prtn) root
14 µM	0	22.8677	1.08534	41.8632	8.73436	0.124564	9.36899
14 µM	0	22.8479	1.04864	44.3451	8.32643	0.282446	10.8743
14 µM	0	23.0725	0.945861	40.2461	5.11805	0.268643	11.0498
14 µM	0	20.1277	1.12941	44.3424	6.11905	0.181571	9.83161
14 µM	0	21.5897	1.21248	53.8344	6.64744	0.37553	15.873
14 µM	100	29.3384	1.04409	45.2085	12.1228	0.152905	10.0754
14 µM	100	27.0927	1.20689	44.6429	11.1822	0.263075	11.4427
14 µM	100	26.6758	1.03661	46.7964	10.4558	0.256632	12.3278
14 µM	100	27.2299	1.27289	51.704	11.8541	0.256837	8.18785
14 µM	100	30.5132	1.62609	46.6479	12.1357	0.285228	13.4882
14 µM	200	30.6858	1.46699	64.7282	15.6661	0.77893	18.5099
14 µM	200	28.5009	1.60549	61.0596	16.2512	0.774041	18.4655
14 µM	200	31.3585	1.42958	76.1004	15.9362	0.763458	23.093
14 µM	200	27.6539	1.50746	72.3484	16.3748	0.779315	17.2026
14 µM	200	30.5762	1.48126	69.4551	16.4222	0.841379	18.3115
14 µM	300	35.4589	1.48213	47.1727	17.6576	0.927882	17.5063
14 µM	300	37.6576	1.45107	64.3205	19.0742	0.725027	15.4569
14 µM	300	35.0887	1.4348	57.2117	20.1121	0.881985	24.0942
14 µM	300	38.0433	1.68702	96.3418	16.1925	0.701505	20.7883
14 µM	300	36.8234	1.62563	88.3105	20.3239	1.05464	23.1607
0 µM	0	12.1651	0.864664	32.1699	7.03238	0.357536	7.66148
0 µM	0	14.0716	0.771605	35.5712	7.73259	0.358694	7.45229
0 µM	0	16.3078	0.857728	29.6812	6.16669	0.345856	6.59031
0 µM	0	15.3306	0.891556	33.222	8.23036	0.284292	3.05364
0 µM	0	14.027	1.0132	32.4663	7.72602	0.363098	8.06452
0 µM	100	17.8253	1.06299	26.3112	10.7909	0.190764	3.95062
0 µM	100	16.0066	1.00507	29.2816	9.30558	0.367975	3.1444
0 µM	100	16.9799	0.875889	27.5711	10.3442	0.306158	3.09095
0 µM	100	18.0201	1.35318	31.4634	10.5718	0.186464	3.61632
0 µM	100	21.2974	1.22494	30.2681	11.6684	0.180953	2.7538
0 µM	200	24.4542	0.79589	48.6763	13.9737	0.602526	11.4791
0 µM	200	21.6015	0.928992	47.8108	11.511	0.734431	10.9864
0 µM	200	23.6214	0.839518	53.8615	11.2687	0.576529	8.21128
0 µM	200	24.5796	1.11306	51.8964	13.7831	0.724654	5.81327
0 µM	200	24.6984	1.0757	52.6062	13.2462	0.534464	10.9003
0 µM	300	26.0299	0.857927	59.9323	16.9301	0.700712	11.4556
0 µM	300	25.0223	1.04388	61.9192	15.3252	0.976497	14.0443
0 µM	300	24.6681	0.862462	58.6134	11.009	0.889984	12.6206
0 µM	300	22.1002	1.14779	68.7651	11.2724	0.752778	9.22289
0 µM	300	24.2307	0.957123	88.5155	15.615	0.908345	11.049

## Sheet: Figure 8
Si (µM)	Treatment (NaCl) (µM)	Chl a (µg g-1 FW)	Chl b (µg g-1 FW)	Car (µg g-1 FW)	Chl a/b ratio	Chl total (µg g-1 FW)
14 µM	0	799.087	233.243	238.94	3.42598	1032.33
14 µM	0	1258.4	382.216	372.192	3.29239	1640.62
14 µM	0	1086	342.092	309.092	3.17457	1428.09
14 µM	0	648.792	198.456	208.695	3.2692	847.248
14 µM	0	872.723	289.678	272.931	3.01273	1162.4
14 µM	0	560.182	168.36	175.219	3.32728	728.542
14 µM	0	585.801	180.877	177.721	3.23866	766.679
14 µM	0	590.26	183.479	173.687	3.21705	773.739
14 µM	100	870.286	256.281	266.563	3.39583	1126.57
14 µM	100	679.066	227.925	202.678	2.97934	906.991
14 µM	100	833.997	252.487	250.625	3.30313	1086.48
14 µM	100	962.714	310.556	297.717	3.09997	1273.27
14 µM	100	834.045	274.542	252.579	3.03795	1108.59
14 µM	100	689.138	223.678	210.893	3.08094	912.816
14 µM	100	663.963	202.201	225.056	3.28367	866.164
14 µM	100	689.138	223.678	210.893	3.08094	912.816
14 µM	200	823.094	281.265	256.977	2.9264	1104.36
14 µM	200	802.428	233.741	251.828	3.43298	1036.17
14 µM	200	1009.51	294.061	317.63	3.43298	1303.57
14 µM	200	571.828	170.585	175.697	3.35216	742.413
14 µM	200	1060.58	362.416	331.121	2.9264	1422.99
14 µM	200	751.926	277.771	258.756	2.707	1029.7
14 µM	200	650.466	246.77	158.797	2.63592	897.236
14 µM	200	833.942	332.107	244.174	2.51106	1166.05
14 µM	300	964.97	303.628	319.385	3.17814	1268.6
14 µM	300	968.708	273.861	288.388	3.53723	1242.57
14 µM	300	604.389	186.449	197.738	3.24157	790.839
14 µM	300	861.015	274.46	277.209	3.13712	1135.48
14 µM	300	644.48	228.228	203.226	2.82384	872.708
14 µM	300	981.866	280.627	290.269	3.49882	1262.49
14 µM	300	942.112	284.456	291.98	3.31198	1226.57
14 µM	300	650.189	194.108	203.62	3.34962	844.297
0 µM	0	960.932	289.092	278.59	3.32396	1250.02
0 µM	0	809.403	236.914	239.801	3.41644	1046.32
0 µM	0	749.708	409.242	159.916	1.83194	1158.95
0 µM	0	566.376	175.663	163.757	3.22421	742.039
0 µM	0	605.878	177.71	170.41	3.40936	783.589
0 µM	0	870.669	240.118	278.136	3.62601	1110.79
0 µM	0	829.217	242.647	242.659	3.41737	1071.86
0 µM	0	744.42	625.161	143.531	1.19077	1369.58
0 µM	100	731.398	236.43	219.767	3.09351	967.828
0 µM	100	672.687	197.192	197.297	3.41133	869.878
0 µM	100	736.124	241.423	219.704	3.0491	977.547
0 µM	100	654.378	223.476	211.838	2.92819	877.854
0 µM	100	651.618	233.16	222.381	2.79472	884.778
0 µM	100	768.099	248.83	231.307	3.08684	1016.93
0 µM	100	672.46	217.048	200.41	3.0982	889.508
0 µM	100	847.911	263.733	261.077	3.21504	1111.64
0 µM	200	699.549	264.726	239.731	2.64254	964.274
0 µM	200	559.324	194.376	188.366	2.87753	753.701
0 µM	200	508.483	164.664	168.561	3.088	673.148
0 µM	200	689.84	210.62	227.928	3.27527	900.46
0 µM	200	836.934	268.874	253.7	3.11273	1105.81
0 µM	200	445.018	140.884	146.243	3.15876	585.901
0 µM	200	942.365	888.667	111.578	1.06043	1831.03
0 µM	200	579.374	208.374	186.48	2.78046	787.747
0 µM	300	472.621	133.281	149.193	3.54606	605.902
0 µM	300	607.427	169.046	187.186	3.59327	776.472
0 µM	300	421.235	141.729	122.737	2.97212	562.964
0 µM	300	454.285	145.301	156.496	3.12652	599.586
0 µM	300	488.614	128.432	137.427	3.80447	617.046
0 µM	300	547.603	157.23	184.611	3.48282	704.832
0 µM	300	752.479	226.297	245.14	3.32518	978.776
0 µM	300	588.516	223.06	171.861	2.63838	811.576

## Sheet: Figure 9
Si (µM)	Treatment (NaCl) (µM)	ΦPSII	ETR	NPQ	Fv/Fm
14 µM	0	0.179	14.1	1.159	0.702
14 µM	0	0.232	18.3	0.863	0.686
14 µM	0	0.128	10.1	1.835	0.64
14 µM	0	0.167	13.2	0.941	0.67
14 µM	0	0.201	15.9	0.716	0.681
14 µM	0	0.119	9.4	1.538	0.598
14 µM	0	0.155	12.2	0.979	0.665
14 µM	0	0.187	14.8	0.64	0.663
14 µM	0	0.158	12.5	0.861	0.657
14 µM	0	0.146	11.6	1.397	0.612
14 µM	0	0.15	11.9	1.425	0.663
14 µM	0	0.208	16.5	1.063	0.785
14 µM	100	0.145	11.5	1.395	0.77
14 µM	100	0.139	11	1.375	0.703
14 µM	100	0.224	17.8	0.722	0.696
14 µM	100	0.196	15.6	0.379	0.737
14 µM	100	0.12	9.5	0.717	0.536
14 µM	100	0.154	12.2	1.336	0.624
14 µM	100	0.132	10.5	0.738	0.592
14 µM	100	0.152	12.1	0.756	0.747
14 µM	100	0.116	9.2	0.781	0.658
14 µM	100	0.121	9.6	1.217	0.636
14 µM	100	0.151	12	1.05	0.753
14 µM	100	0.138	11	1.038	0.743
14 µM	200	0.14	11.1	0.764	0.73
14 µM	200	0.134	10.6	0.553	0.759
14 µM	200	0.151	12	0.627	0.665
14 µM	200	0.167	13.3	0.582	0.767
14 µM	200	0.117	9.3	1.024	0.723
14 µM	200	0.133	10.6	0.722	0.669
14 µM	200	0.123	9.8	0.899	0.656
14 µM	200	0.168	13.3	0.878	0.781
14 µM	200	0.117	9.3	1.198	0.766
14 µM	200	0.156	12.4	0.845	0.732
14 µM	200	0.135	10.7	1.082	0.77
14 µM	200	0.093	7.4	1.715	0.823
14 µM	300	0.154	12.2	1.16	0.627
14 µM	300	0.156	12.4	1.089	0.59
14 µM	300	0.095	7.5	0.838	0.563
14 µM	300	0.081	6.4	1.582	0.73
14 µM	300	0.132	10.5	1.475	0.689
14 µM	300	0.107	8.5	0.935	0.683
14 µM	300	0.1	7.9	1.017	0.765
14 µM	300	0.099	7.9	1.182	0.751
14 µM	300	0.137	10.9	1.255	0.749
14 µM	300	0.116	9.2	1.303	0.67
14 µM	300	0.12	9.5	0.952	0.662
14 µM	300	0.11	8.7	1.039	0.726
0 µM	0	0.115	9	1.988	0.788
0 µM	0	0.115	9.1	7.152	0.703
0 µM	0	0.117	9.2	1.016	0.644
0 µM	0	0.077	6.1	0.969	0.689
0 µM	0	0.075	5.9	1.237	0.691
0 µM	0	0.083	6.6	1.233	0.708
0 µM	0	0.076	6	1.267	0.724
0 µM	0	0.076	6	1.095	0.658
0 µM	0	0.081	6.4	0.941	0.689
0 µM	0	0.08	6.3	1.168	0.6
0 µM	0	0.07	5.5	0.931	0.56
0 µM	0	0.118	9.3	0.831	0.688
0 µM	100	0.052	4.1	1.273	0.694
0 µM	100	0.054	4.3	1.14	0.691
0 µM	100	0.07	5.5	1.11	0.662
0 µM	100	0.059	4.7	0.931	0.651
0 µM	100	0.051	4	1.302	0.612
0 µM	100	0.04	3.2	1.58	0.695
0 µM	100	0.078	6.2	0.696	0.645
0 µM	100	0.053	4.2	0.814	0.666
0 µM	100	0.088	6.9	1.438	0.652
0 µM	100	0.066	5.2	1.309	0.687
0 µM	100	0.061	4.8	1.672	0.604
0 µM	100	0.146	11.5	1.092	0.797
0 µM	200	0.078	6.2	2.05	0.778
0 µM	200	0.04	3.2	1.964	0.689
0 µM	200	0.03	2.4	2.407	0.583
0 µM	200	0.121	9.6	1.409	0.681
0 µM	200	0.04	3.2	1.861	0.613
0 µM	200	0.036	2.9	1.837	0.618
0 µM	200	0.043	3.4	2.257	0.621
0 µM	200	0.171	13.6	1.893	0.711
0 µM	200	0.044	3.5	2.151	0.675
0 µM	200	0.104	8.3	1.379	0.685
0 µM	200	0.102	8.1	1.413	0.702
0 µM	200	0.079	6.3	1.596	0.655
0 µM	300	0.045	3.6	1.439	0.644
0 µM	300	0.103	8.2	1.583	0.694
0 µM	300	0.05	4	1.453	0.615
0 µM	300	0.085	6.7	1.096	0.66
0 µM	300	0.046	3.7	1.606	0.614
0 µM	300	0.074	5.9	1.406	0.604
0 µM	300	0.142	11.3	1.233	0.542
0 µM	300	0.05	4	1.62	0.624
0 µM	300	0.083	6.6	1.622	0.589
0 µM	300	0.041	3.3	1.514	0.604
0 µM	300	0.073	5.8	1.641	0.683
0 µM	300	0.141	11.3	0.98	0.713

## Sheet: Figure 10
Si (µM)	Treatment (NaCl)(µM)	qP	qN	qL	ΦNO	ΦNPQ
14 µM	0	0.363	0.674	0.224	0.38	0.441
14 µM	0	0.446	0.593	0.278	0.412	0.356
14 µM	0	0.34	0.793	0.243	0.308	0.564
14 µM	0	0.359	0.642	0.231	0.429	0.404
14 µM	0	0.383	0.551	0.228	0.466	0.333
14 µM	0	0.353	0.778	0.266	0.347	0.534
14 µM	0	0.354	0.667	0.235	0.427	0.418
14 µM	0	0.36	0.523	0.213	0.496	0.317
14 µM	0	0.325	0.603	0.198	0.453	0.389
14 µM	0	0.411	0.758	0.31	0.356	0.498
14 µM	0	0.381	0.755	0.272	0.35	0.5
14 µM	0	0.362	0.646	0.195	0.384	0.408
14 µM	100	0.279	0.719	0.157	0.357	0.498
14 µM	100	0.287	0.71	0.172	0.362	0.499
14 µM	100	0.409	0.543	0.238	0.451	0.325
14 µM	100	0.303	0.362	0.132	0.583	0.221
14 µM	100	0.31	0.578	0.216	0.513	0.367
14 µM	100	0.4	0.736	0.291	0.362	0.484
14 µM	100	0.293	0.562	0.186	0.5	0.368
14 µM	100	0.252	0.539	0.118	0.483	0.365
14 µM	100	0.238	0.583	0.138	0.496	0.388
14 µM	100	0.3	0.714	0.204	0.397	0.482
14 µM	100	0.271	0.639	0.141	0.414	0.435
14 µM	100	0.256	0.643	0.137	0.423	0.439
14 µM	200	0.247	0.559	0.124	0.487	0.373
14 µM	200	0.222	0.485	0.101	0.557	0.309
14 µM	200	0.279	0.5	0.151	0.522	0.327
14 µM	200	0.262	0.477	0.115	0.527	0.306
14 µM	200	0.221	0.637	0.117	0.436	0.447
14 µM	200	0.255	0.548	0.141	0.504	0.363
14 µM	200	0.258	0.615	0.153	0.462	0.415
14 µM	200	0.275	0.582	0.128	0.443	0.389
14 µM	200	0.21	0.669	0.105	0.402	0.481
14 µM	200	0.273	0.579	0.139	0.458	0.386
14 µM	200	0.235	0.642	0.116	0.416	0.449
14 µM	200	0.163	0.746	0.078	0.334	0.573
14 µM	300	0.375	0.696	0.261	0.392	0.454
14 µM	300	0.406	0.687	0.296	0.404	0.44
14 µM	300	0.241	0.618	0.161	0.492	0.413
14 µM	300	0.171	0.75	0.098	0.356	0.563
14 µM	300	0.303	0.745	0.197	0.351	0.517
14 µM	300	0.21	0.614	0.115	0.461	0.432
14 µM	300	0.171	0.622	0.079	0.446	0.454
14 µM	300	0.183	0.671	0.094	0.413	0.488
14 µM	300	0.258	0.685	0.14	0.383	0.48
14 µM	300	0.264	0.715	0.167	0.384	0.5
14 µM	300	0.257	0.637	0.155	0.451	0.429
14 µM	300	0.202	0.634	0.104	0.437	0.453
0 µM	0	0.246	0.802	0.148	0.296	0.589
0 µM	0	0.201	0.9	0.097	0.109	0.776
0 µM	0	0.257	0.649	0.158	0.438	0.445
0 µM	0	0.157	0.639	0.087	0.469	0.454
0 µM	0	0.158	0.694	0.09	0.414	0.511
0 µM	0	0.172	0.695	0.097	0.411	0.506
0 µM	0	0.153	0.696	0.083	0.407	0.517
0 µM	0	0.167	0.668	0.098	0.441	0.483
0 µM	0	0.165	0.63	0.091	0.473	0.446
0 µM	0	0.221	0.72	0.153	0.424	0.496
0 µM	0	0.182	0.644	0.12	0.482	0.448
0 µM	0	0.24	0.61	0.139	0.482	0.4
0 µM	100	0.126	0.738	0.078	0.417	0.531
0 µM	100	0.122	0.7	0.072	0.442	0.504
0 µM	100	0.168	0.703	0.106	0.441	0.489
0 µM	100	0.138	0.658	0.084	0.487	0.454
0 µM	100	0.151	0.758	0.105	0.412	0.537
0 µM	100	0.103	0.782	0.065	0.372	0.588
0 µM	100	0.167	0.571	0.096	0.543	0.379
0 µM	100	0.113	0.609	0.063	0.522	0.425
0 µM	100	0.234	0.764	0.16	0.374	0.538
0 µM	100	0.163	0.745	0.104	0.405	0.529
0 µM	100	0.193	0.803	0.14	0.351	0.588
0 µM	100	0.242	0.639	0.113	0.408	0.446
0 µM	200	0.174	0.811	0.104	0.302	0.62
0 µM	200	0.115	0.83	0.078	0.324	0.636
0 µM	200	0.12	0.874	0.093	0.285	0.685
0 µM	200	0.276	0.731	0.176	0.365	0.514
0 µM	200	0.125	0.82	0.089	0.336	0.624
0 µM	200	0.121	0.828	0.088	0.34	0.624
0 µM	200	0.149	0.856	0.11	0.294	0.663
0 µM	200	0.432	0.808	0.315	0.287	0.542
0 µM	200	0.14	0.853	0.101	0.303	0.653
0 µM	200	0.241	0.735	0.153	0.377	0.519
0 µM	200	0.227	0.735	0.139	0.372	0.526
0 µM	200	0.196	0.763	0.127	0.355	0.566
0 µM	300	0.12	0.76	0.078	0.392	0.563
0 µM	300	0.243	0.762	0.156	0.347	0.55
0 µM	300	0.142	0.768	0.097	0.387	0.563
0 µM	300	0.193	0.681	0.118	0.437	0.478
0 µM	300	0.139	0.794	0.098	0.366	0.588
0 µM	300	0.194	0.736	0.129	0.385	0.541
0 µM	300	0.398	0.706	0.299	0.384	0.474
0 µM	300	0.146	0.792	0.101	0.363	0.587
0 µM	300	0.243	0.78	0.175	0.35	0.567
0 µM	300	0.123	0.781	0.086	0.381	0.578
0 µM	300	0.184	0.781	0.12	0.351	0.576
0 µM	300	0.27	0.63	0.15	0.434	0.425

[truncated: 1 more sheets: Figure 11]
